# Supplementary material for: Efficacy and Safety of Novel Aspirin Formulations: A Randomized, Double-Blind, Placebo-Controlled Study
Source: MDPI journal article supplement (doi:10.3390/pharmaceutics14010187), 2022-01-13
Supplement: s1 [file s1]

# Supplementary Materials: Efficacy and Safety of Novel Aspirin Formulations: A Randomized, Double-Blind, Placebo-Controlled Study

Rocco Mollace, Micaela Gliozzi, Roberta Macrì, Annamaria Tavernese, Vincenzo Musolino, Cristina Carresi, Jessica Maiuolo, Carolina Muscoli, Carlo Tomino, Giuseppe M. Rosano, Massimo Fini, Maurizio Volterrani, Bruno Silvestrini and Vincenzo Mollace

## CLINICAL STUDY PROTOCOL

### *Study Title:*

"Efficacy and safety of novel aspirin formulation: a randomized, double blind, placebo-controlled study".

### *Study Drug:*

Standard acetylsalicylic acid in oral and sublingual (50 and 100 mg) formulations and micronized, collagen co-grinded acetylsalicylic acid in oral and sublingual (50 and 100 mg) formulations

### *Indication Primary:*

Prevention of cardiovascular disease

### *Development Phase:*

Phase IIb

### *Protocol Code:*

ASA-001

### *Promotore:*

No Profit

### *Investigator:*

Vincenzo Mollace

### *Executive Scientific Committee:*

Vincenzo Mollace, Bruno Silvestrini, Fabrizio Stocchi, Cristiana Vitale

### *EudraCT Number:*

2013-002980-24

### *Version and Date:*

Final  
July 1<sup>st</sup> 2013

## INDEX

### 1. BACKGROUND

### 2. STUDY OBJECTIVES AND PURPOSE

### **3. STUDY DESIGN**

#### *3.1. Primary objectives*

##### *3.1.a. Efficacy*

##### *3.1.b. Safety*

#### *3.2. Secondary objectives*

##### *3.2.a. Efficacy*

### **4. DESIGN and METHODOLOGY of the planned research**

#### *4.1. Experimental design*

##### *4.1.a. Study plan and investigational schedule*

### **5. SUBJECTS**

#### *5.1. Inclusion criteria*

#### *5.2. Non-inclusion criteria*

#### *5.3. Sample size calculation*

### **6. METHODS OF ASSESMENT**

- a. Assessment of blood pressure
- b. Assessment of cardiovascular risk with the Systematic Coronary Risk Evaluation (SCORE)chart
- c. Assessment of faecal occult blood
- d. Laboratory analyses
- e. Assessment of platelet aggregation
- f. Urea breath test (UBT)

### **7. MEASURES TO MINIMIZE BIAS**

### **8. STUDY PRODUCT AND BLINDING SYSTEMS**

#### *8.1. Products administered*

##### *8.1.a. Description of the study products* *8.1.a1 Pharmaceutical form*

##### *8.1.a2 Unit dosage* *8.1.a3 Composition*

#### *8.2. Treatment management*

#### *8.3. Management of blinding systems*

#### *8.4. Discontinuation of the study*

##### *8.4.a. Premature discontinuation of the study*

### **9. SOURCE DATA**

### **10. WITHDRAWAL OF PATIENTS**

#### *10.1. Patient withdrawal and discontinuation of study medication*

##### *10.1.a. Withdrawal criteria*

##### *10.1.a2. Procedure*

## **11. TREATMENT OF PARTICIPANTS**

*11.1. Treatments administered*

*11.2. Treatments dispensing*

*11.3. Previous and concomitant treatments*

*11.3.1. Previous treatments*

*11.3.2. New concomitant treatments during the study*

*11.4. Treatment compliance*

*11.5. Arrangements after the discontinuation of the study treatment*

## **12. ASSESSMENT OF EFFICACY**

*12.1. Efficacy measurements*

## **13. ASSESSMENT OF SAFETY**

*13.1. Safety measurements*

## **14. SECONDARY OBJECTIVES**

*14.1. Efficacy*

## **15. POTENTIAL SIDE EFFECTS, RISKS or HAZARDS for research participants**

*15.1. Responsibilities of investigator*

*15.1.a. Recording of Adverse Events in the Case Report Form*  
*15.1.a1. Events to be recorded*

*15.2. Recording methods*

*15.3. Follow-up of Adverse Events*

*15.4. Procedure for an Event requiring immediate notification*

*15.5. Evaluation of causality*

*15.6. Responsibilities of PI*

## **16. STATISTICS**

*16.1. Responsibility for Analysis*

*16.2. Hypotheses/Estimation*

*16.3. Analysis Endpoints*

*16.3.1. Efficacy Endpoints*

*16.3.2. Primary Endpoint*

*16.3.3. Secondary Endpoints*

*16.3.4. Safety Endpoints*

*16.4. Analysis Populations*

16.4.1. Efficacy Analysis Populations

16.4.2. Safety Analysis Populations

16.5. *Efficacy Analysis*

16.5.1. Primary Endpoint Analysis

16.5.2. Secondary Endpoint Analysis

16.6. *Evaluation of Safety*

16.7. *Summaries of Baseline Characteristics*

16.8. *Interim Analysis*

16.9. *Determination of Sample Size*

## **17. DIRECT ACCESS TO SOURCE DATA/DOCUMENTS**

## **18. QUALITY CONTROL AND QUALITY ASSURANCE**

18.1. *Study monitoring*

18.1.a. Before the study

18.1.b. During the study

18.2. *Audit – Inspection*

## **19. ETHICS**

19.1. *Ethics Committee(s)*

19.1. *Study conduct*

19.1. *Patient Information and Informed Consent*

## **20. DATA HANDLING AND RECORD KEEPING**

20.1. *Study data*

20.2. *Data management*

20.3. *Archiving*

## **21. INSURANCE**

## **22. OWNERSHIP OF THE RESULTS – PUBLICATION POLICY**

## **23. INTELLECTUAL PROPERTY**

## **24. SUBSTANTIAL PROTOCOL AMENDMENT**

## **25. FINAL STUDY REPORT**

## **26. ORGANISATION OF THE CENTRE**

## **27. REFERENCES**

## Appendix 1

### INCLUSION AND EXCLUSION CRITERIA

#### 4. SUBJECTS

Patients were eligible for participation in the present study if fulfilling the following criteria:

##### 4.1. Inclusion criteria

- Men or women
- Age  $\geq 18$  years
- Healthy volunteers with no cardiovascular risk, assessed by using the SCORE system ( $<1\%$  for 10-year risk of fatal CVD), according to the European Guidelines on cardiovascular disease prevention in clinical practice
- Written informed consent.

All enrolled **women** of reproductive age will undergo a pregnancy test and had to use birth control measures during the whole study.

All concomitant treatment(s) should have been initiated for at least 3 months and are expected to be maintained at a fixed dose during the entire duration of the study.

##### 4.2. Non-inclusion criteria

- Age  $<18$  years
- Positive pregnancy test ( $\beta$ GCH) performed at the selection visit or results not available, women who are pregnant, women who are breast-feeding, women of childbearing potential not using estro-progestative or progestative or intrauterine contraception, or women using estro-progestative or progestative or intrauterine contraception, but who consider stopping it during the planned duration of the study
- Patients at very high or low cardiovascular risk, having a calculated SCORE  $\geq 10\%$
- History of atrial fibrillation or atrial flutter
- Patient in treatment with or with indication to oral anticoagulants or other antithrombotic drugs
- Patient with history of hypersensitivity or intolerance with acetylsalicylic acid or other non-steroidal anti-inflammatory drugs (NSAIDs)
- Patients with any history of hereditary angioedema, idiopathic or associated with acetylsalicylic acid
- Patients with history of peptic ulcers or gastritis or history of gastrointestinal bleeding associated to acetylsalicylic acid or other non-steroidal anti-inflammatory drugs (NSAIDs)
- Patients with severe gastro-intestinal tract disorders with possible influence on drug absorption or electrolytes
- Patient with asthma or NSAID-precipitated bronchospasm
- Patients with known coagulation disorders or with abnormal platelet count ( $<100,000$  per  $\text{mm}^3$  or  $>400,000$  per  $\text{mm}^3$ ) or with other acquired causes of impaired platelet aggregation, including uremia and paraproteinemia (monoclonal gammopathy)
- Patients with haemophilia or other bleeding disorders
- Patients with myeloproliferative disorders
- Patients with severe chronic kidney disease ( $\text{GFR} < 30 \text{ mL/min/1.73 m}^2$ ), using Cockcroft's formula:
  - men =  $(140 - \text{age}) \times \text{weight (kg)} / (0.814 \times \text{creatinine level } (\mu\text{mol/L}))$
  - women =  $0.85 \times [(140 - \text{age}) \times \text{weight (kg)} / (0.814 \times \text{creatinine level } (\mu\text{mol/L}))]$

- Patients with known liver disease or biliary obstructive disorders, with or without complications (chronic hepatitis, cirrhosis, etc) or with ALT or AST upper than 3 times the upper limit of normal laboratory range
- Patient with hyperkalemia
- History of alcoholism or drug abuse
- Patients unlikely to co-operate in the study or to comply well with treatment or with the study visits
- Participation in another study at the same time or within the preceding 30 days, (or a longer period in accordance to the local regulations)
- History of severe disease likely to interfere with the conduct of the study, severe uncontrolled infection, evolving neoplasm
- History of severe mental or psychiatric disorder, severe depression or history of severe depression, e.g. requiring an hospitalization or at high risk of suicide attempt
- Endocrine diseases: uncontrolled dys-thyroidia, Cushing's syndrome, acromegalia, hyperparathyroidia
- Patient with a life expectancy of less than the 15 months duration of the study in opinion to the investigator
- Patients with HIV or taking drugs for HIV.

### Concerning concomitant medications

The use of the following treatments prevents the patient from being selected: antidepressant such as citalopram, duloxetine, escitalopram, fluoxetine, fluvoxamine, paroxetine, sertraline or venlafaxine; other non-steroidal anti-inflammatory drugs (NSAIDs) or another salicylate such as choline salicylate and/or magnesium salicylate or salsalate (Disalcid), ibuprofen, indomethacin, naproxen, and tiaprofenic acid when taken regularly, Adefovir, chlorpheniramine/ibuprofen/pseudoephedrine, iphenhydramine/ibuprofen, brinzolamide and dorzolamide ophthalmic, emtricitabine, immunoglobulin, dichlorphenamide, acetazolamide, sodium biphosphate/sodium phosphate, methazolamide, tacrolimus, influenza virus vaccine, sirolimus, hydrocodone, methotrexate, tenofovir, aminophylline, antihistamines, oral anticoagulants or other antithrombotic drugs, statins, nitrates, corticosteroids, cephalosporins, agents that cause urinary alkalization (ie potassium or sodium citrate), antacids containing either aluminum and magnesium hydroxide or calcium carbonate two hours before acetylsalicylic acid dosing, dietary supplements (ginkgo, vitamin E, garlic, ginger, ginseng, omega-3 fatty acids (fish oil), local anaesthetics (procaine).
